# Supplementary material for: F2RL3 Methylation as a Biomarker of Current and Lifetime Smoking Exposures
Source: PubMed Central journal article supplement (PMC3915264; doi:10.1289/ehp.1306937), 2013-11-22
Supplement: ehp.1306937.s001.pdf [file ehp.1306937.s001.pdf]

## **Supplemental Material**

### ***F2RL3* Methylation as a Biomarker of Current and Lifetime Smoking Exposures**

Yan Zhang, Rongxi Yang, Barbara Burwinkel, Lutz P. Breitling, and Hermann Brenner

#### **Table of Contents**

Table S1, pages 2-3

Table S2, page 4

Table S3, page 5

Table S4, page 6

Table S5, page 7

Figure S1, page 8

Supplemental Material, Table S1. Baseline characteristics and *F2RL3* methylation intensity of the study population

| Characteristics                      | <i>F2RL3</i> CpG2  |                              | <i>F2RL3</i> CpG4  |                              | <i>F2RL3</i> CpG5  |                              |
|--------------------------------------|--------------------|------------------------------|--------------------|------------------------------|--------------------|------------------------------|
|                                      | Median(Q1-Q3)      | <i>P</i> -value <sup>a</sup> | Median(Q1-Q3)      | <i>P</i> -value <sup>a</sup> | Median(Q1-Q3)      | <i>P</i> -value <sup>a</sup> |
| Overall                              | 0.85 (0.81 – 0.88) |                              | 0.79(0.72 – 0.84)  |                              | 0.86 (0.82 – 0.88) |                              |
| Sex                                  |                    |                              |                    |                              |                    |                              |
| Male                                 | 0.84 (0.77 – 0.87) |                              | 0.77(0.66 – 0.82)  |                              | 0.85 (0.80 – 0.88) |                              |
| Female                               | 0.86 (0.82 – 0.88) | <0.0001                      | 0.80(0.75 – 0.84)  | <0.0001                      | 0.86 (0.83 – 0.89) | <0.0001                      |
| Age (years)                          |                    |                              |                    |                              |                    |                              |
| 50-59                                | 0.85 (0.79 – 0.88) |                              | 0.79(0.69 – 0.84)  |                              | 0.86 (0.81 – 0.89) |                              |
| 60-64                                | 0.85 (0.81 – 0.88) |                              | 0.80(0.72 – 0.84)  |                              | 0.86 (0.82 – 0.89) |                              |
| 65-69                                | 0.85 (0.82 – 0.88) |                              | 0.79(0.73 – 0.84)  |                              | 0.86 (0.82 – 0.89) |                              |
| 70-75                                | 0.85 (0.81 – 0.87) | 0.04                         | 0.79(0.72 – 0.84)  | 0.04                         | 0.85 (0.82 – 0.88) | 0.06                         |
| Body mass index (kg/m <sup>2</sup> ) |                    |                              |                    |                              |                    |                              |
| Underweight (<18.5)                  | 0.81 (0.73 – 0.87) |                              | 0.71(0.62 – 0.84)  |                              | 0.84 (0.79 – 0.88) |                              |
| Normal weight (18.5-<25.0)           | 0.85 (0.79 – 0.88) |                              | 0.79(0.69 – 0.83)  |                              | 0.85 (0.81 – 0.88) |                              |
| Overweight (25.0-<30.0)              | 0.85 (0.81 – 0.88) |                              | 0.79(0.73 – 0.84)  |                              | 0.86 (0.82 – 0.89) |                              |
| Obesity (≥30.0)                      | 0.85 (0.81 – 0.88) | 0.004                        | 0.79(0.72 – 0.83)  | 0.005                        | 0.86 (0.82 – 0.88) | 0.03                         |
| Smoking status                       |                    |                              |                    |                              |                    |                              |
| Never smoker                         | 0.87 (0.84 – 0.89) |                              | 0.82(0.78 – 0.85)  |                              | 0.87 (0.85 – 0.89) |                              |
| Former smoker                        | 0.84 (0.80 – 0.87) |                              | 0.77(0.70 – 0.82)  |                              | 0.86 (0.82 – 0.88) |                              |
| Current smoker                       | 0.75 (0.67 – 0.81) | <0.0001                      | 0.62(0.53 – 0.73)  | <0.0001                      | 0.77 (0.72 – 0.84) | <0.0001                      |
| Alcohol consumption (g/d)            |                    |                              |                    |                              |                    |                              |
| Abstainer                            | 0.85 (0.80 – 0.88) |                              | 0.79(0.71 – 0.84)  |                              | 0.86 (0.82 – 0.89) |                              |
| Low                                  | 0.85 (0.81 – 0.88) |                              | 0.79(0.72 – 0.84)  |                              | 0.86 (0.82 – 0.89) |                              |
| Intermediate                         | 0.85 (0.79 – 0.88) |                              | 0.79(0.71 – 0.84)  |                              | 0.86 (0.82 – 0.89) |                              |
| High                                 | 0.85 (0.81 – 0.88) | 0.86                         | 0.79 (0.73 – 0.83) | 0.96                         | 0.87 (0.82 – 0.89) | 0.90                         |
| Physical activity <sup>b</sup>       |                    |                              |                    |                              |                    |                              |
| Inactive                             | 0.85 (0.80 – 0.88) |                              | 0.79(0.71 – 0.83)  |                              | 0.85 (0.81 – 0.88) |                              |
| Insufficient                         | 0.85 (0.80 – 0.88) |                              | 0.79 (0.71 – 0.83) |                              | 0.86 (0.82 – 0.88) |                              |
| Sufficient                           | 0.85 (0.82 – 0.88) | 0.007                        | 0.80(0.74 – 0.84)  | 0.0002                       | 0.86 (0.83 – 0.89) | 0.0006                       |
| Diabetes                             |                    |                              |                    |                              |                    |                              |
| Not prevalent                        | 0.85 (0.81 – 0.88) |                              | 0.79(0.72 – 0.84)  |                              | 0.86 (0.82 – 0.89) |                              |
| Prevalent                            | 0.85 (0.80 – 0.88) | 0.06                         | 0.78(0.69 – 0.83)  | 0.05                         | 0.85 (0.81 – 0.88) | 0.005                        |
| Hypertension                         |                    |                              |                    |                              |                    |                              |
| Not prevalent                        | 0.85 (0.81 – 0.88) |                              | 0.79(0.72 – 0.84)  |                              | 0.86 (0.82 – 0.89) |                              |
| Prevalent                            | 0.85 (0.80 – 0.88) | 0.47                         | 0.79(0.71 – 0.83)  | 0.45                         | 0.86 (0.82 – 0.88) | 0.23                         |

| Characteristics        | <i>F2RL3</i> CpG2  |                              | <i>F2RL3</i> CpG4 |                              | <i>F2RL3</i> CpG5  |                              |
|------------------------|--------------------|------------------------------|-------------------|------------------------------|--------------------|------------------------------|
|                        | Median(Q1-Q3)      | <i>P</i> -value <sup>a</sup> | Median(Q1-Q3)     | <i>P</i> -value <sup>a</sup> | Median(Q1-Q3)      | <i>P</i> -value <sup>a</sup> |
| Cardiovascular disease |                    |                              |                   |                              |                    |                              |
| Not prevalent          | 0.85 (0.81 – 0.88) |                              | 0.79(0.72 – 0.84) |                              | 0.86 (0.82 – 0.89) |                              |
| Prevalent              | 0.85 (0.79 – 0.87) | 0.004                        | 0.78(0.68 – 0.82) | <0.0001                      | 0.85 (0.81 – 0.88) | 0.003                        |
| Cancer                 |                    |                              |                   |                              |                    |                              |
| Not prevalent          | 0.85 (0.81 – 0.88) |                              | 0.79(0.72 – 0.84) |                              | 0.86 (0.82 – 0.88) |                              |
| Prevalent              | 0.85 (0.81 – 0.87) | 0.30                         | 0.78(0.71 – 0.83) | 0.18                         | 0.85 (0.82 – 0.88) | 0.36                         |

Abbreviations: Q1, 1<sup>st</sup> quartile; Q3, 3<sup>rd</sup> quartile. <sup>a</sup> Kruskal-Wallis test for group differences. <sup>b</sup> Categories defined as follows: inactive, <1 hour/week of physical activity; medium/high: ≥2 hour/week of vigorous physical activity or ≥2 hours/week of light physical activity; low, other.

Supplemental Material, Table S2. Median *F2RL3* methylation intensity of the study population according to smoking characteristics

|                                                                    | Current smokers (n=654) |                              |      |                              |      |                              | Former smokers (n=1136) |                              |      |                              |      |                              |
|--------------------------------------------------------------------|-------------------------|------------------------------|------|------------------------------|------|------------------------------|-------------------------|------------------------------|------|------------------------------|------|------------------------------|
|                                                                    | CpG2                    | <i>P</i> -value <sup>a</sup> | CpG4 | <i>P</i> -value <sup>a</sup> | CpG5 | <i>P</i> -value <sup>a</sup> | CpG2                    | <i>P</i> -value <sup>a</sup> | CpG4 | <i>P</i> -value <sup>a</sup> | CpG5 | <i>P</i> -value <sup>a</sup> |
| Age at initiation of smoking (years) <sup>b</sup>                  |                         |                              |      |                              |      |                              |                         |                              |      |                              |      |                              |
| 10-14                                                              | 0.71                    |                              | 0.58 |                              | 0.74 |                              | 0.82                    |                              | 0.76 |                              | 0.83 |                              |
| 15-19                                                              | 0.72                    |                              | 0.60 |                              | 0.76 |                              | 0.84                    |                              | 0.77 |                              | 0.86 |                              |
| 20-24                                                              | 0.74                    |                              | 0.62 |                              | 0.77 |                              | 0.85                    |                              | 0.78 |                              | 0.86 |                              |
| 25-62                                                              | 0.77                    | 0.002                        | 0.65 | 0.008                        | 0.80 | 0.005                        | 0.84                    | 0.16                         | 0.77 | 0.18                         | 0.85 | 0.03                         |
| Lifetime duration of smoking (years) <sup>c</sup>                  |                         |                              |      |                              |      |                              |                         |                              |      |                              |      |                              |
| 1-19                                                               | 0.78                    |                              | 0.68 |                              | 0.81 |                              | 0.87                    |                              | 0.82 |                              | 0.87 |                              |
| 20-29                                                              | 0.77                    |                              | 0.64 |                              | 0.78 |                              | 0.86                    |                              | 0.80 |                              | 0.87 |                              |
| 30-39                                                              | 0.74                    |                              | 0.62 |                              | 0.77 |                              | 0.84                    |                              | 0.77 |                              | 0.85 |                              |
| 40-59                                                              | 0.73                    | 0.11                         | 0.61 | 0.13                         | 0.77 | 0.16                         | 0.81                    | <0.0001                      | 0.70 | <0.0001                      | 0.83 | <0.0001                      |
| Cumulative dose of smoking (pack-years) <sup>d</sup>               |                         |                              |      |                              |      |                              |                         |                              |      |                              |      |                              |
| 0.2- 9                                                             | 0.82                    |                              | 0.72 |                              | 0.84 |                              | 0.86                    |                              | 0.81 |                              | 0.87 |                              |
| 10-19                                                              | 0.80                    |                              | 0.69 |                              | 0.81 |                              | 0.85                    |                              | 0.78 |                              | 0.86 |                              |
| 20-29                                                              | 0.74                    |                              | 0.62 |                              | 0.77 |                              | 0.83                    |                              | 0.74 |                              | 0.84 |                              |
| 30-147                                                             | 0.72                    | <0.0001                      | 0.59 | <0.0001                      | 0.76 | <0.0001                      | 0.81                    | <0.0001                      | 0.71 | <0.0001                      | 0.84 | <0.0001                      |
| Current intensity of smoking<br>(average number of cigarette /day) |                         |                              |      |                              |      |                              |                         |                              |      |                              |      |                              |
| 1- 9                                                               | 0.81                    |                              | 0.72 |                              | 0.82 |                              |                         |                              |      |                              |      |                              |
| 10-19                                                              | 0.74                    |                              | 0.62 |                              | 0.77 |                              |                         |                              |      |                              |      |                              |
| 20-29                                                              | 0.73                    |                              | 0.60 |                              | 0.76 |                              |                         |                              |      |                              |      |                              |
| 30-60                                                              | 0.68                    | <0.0001                      | 0.56 | <0.0001                      | 0.74 | <0.0001                      |                         |                              |      |                              |      |                              |
| Time since cessation of smoking<br>(years)                         |                         |                              |      |                              |      |                              |                         |                              |      |                              |      |                              |
| 1                                                                  |                         |                              |      |                              |      |                              | 0.78                    |                              | 0.66 |                              | 0.82 |                              |
| 2-4                                                                |                         |                              |      |                              |      |                              | 0.81                    |                              | 0.70 |                              | 0.83 |                              |
| 5-9                                                                |                         |                              |      |                              |      |                              | 0.81                    |                              | 0.72 |                              | 0.83 |                              |
| 10-20                                                              |                         |                              |      |                              |      |                              | 0.84                    |                              | 0.76 |                              | 0.86 |                              |
| 20-50                                                              |                         |                              |      |                              |      |                              | 0.86                    | <0.0001                      | 0.80 | <0.0001                      | 0.87 | <0.0001                      |

<sup>a</sup> Kruskal-Wallis test for group differences. <sup>b</sup> Categories for former smokers are: 10-14/15-19/20-24/25-56. <sup>c</sup> Categories for former smokers are: 1-9/10-19/20-29/30-60. <sup>d</sup> Categories for former smokers are: 0.5-9/10-19/20-29/30-101.

Supplemental Material, Table S3. Association between smoking behavior and *F2RL3* methylation intensity

| Smoking characteristics                                                     | <i>F2RL3</i> CpG2                               |                 | <i>F2RL3</i> CpG4                               |                 | <i>F2RL3</i> CpG5                               |                 |
|-----------------------------------------------------------------------------|-------------------------------------------------|-----------------|-------------------------------------------------|-----------------|-------------------------------------------------|-----------------|
|                                                                             | Regression coefficient <sup>a</sup><br>(95% CI) | <i>P</i> -value | Regression coefficient <sup>a</sup><br>(95% CI) | <i>P</i> -value | Regression coefficient <sup>a</sup><br>(95% CI) | <i>P</i> -value |
| <b>Smoking status</b>                                                       |                                                 |                 |                                                 |                 |                                                 |                 |
| Never smoker                                                                | Ref.                                            |                 | Ref.                                            |                 | Ref.                                            |                 |
| Former smoker                                                               | -0.030 (-0.036, -0.024)                         | <0.0001         | -0.051 (-0.058, -0.044)                         | <0.0001         | -0.017 (-0.022, -0.013)                         | <0.0001         |
| Current smoker                                                              | -0.125 (-0.132, -0.118)                         | <0.0001         | -0.181 (-0.189, -0.173)                         | <0.0001         | -0.094 (-0.099, -0.088)                         | <0.0001         |
| <b>Current intensity of smoking<br/>(average number of cigarettes /day)</b> |                                                 |                 |                                                 |                 |                                                 |                 |
| 0 (Never and former)                                                        | Ref.                                            |                 | Ref.                                            |                 | Ref.                                            |                 |
| 1-9                                                                         | -0.058 (-0.073, -0.042)                         | <0.0001         | -0.093 (-0.111, -0.074)                         | <0.0001         | -0.047 (-0.058, -0.035)                         | <0.0001         |
| 10-19                                                                       | -0.124 (-0.136, -0.112)                         | <0.0001         | -0.178 (-0.192, -0.164)                         | <0.0001         | -0.097 (-0.106, -0.088)                         | <0.0001         |
| 20-29                                                                       | -0.126 (-0.136, -0.116)                         | <0.0001         | -0.177 (-0.189, -0.166)                         | <0.0001         | -0.100 (-0.107, -0.093)                         | <0.0001         |
| 30-60                                                                       | -0.162 (-0.177, -0.147)                         | <0.0001         | -0.210 (-0.228, -0.192)                         | <0.0001         | -0.118 (-0.129, -0.106)                         | <0.0001         |
| <b>Cumulative dose of smoking (pack-years)</b>                              |                                                 |                 |                                                 |                 |                                                 |                 |
| 0 (Never smokers)                                                           | Ref.                                            |                 | Ref.                                            |                 | Ref.                                            |                 |
| 0.2-9                                                                       | -0.016 (-0.025, -0.006)                         | 0.0012          | -0.025 (-0.036, -0.014)                         | <0.0001         | -0.008 (-0.016, -0.001)                         | 0.03            |
| 10-19                                                                       | -0.043 (-0.052, -0.034)                         | <0.0001         | -0.067 (-0.078, -0.057)                         | <0.0001         | -0.028 (-0.035, -0.021)                         | <0.0001         |
| 20-29                                                                       | -0.077 (-0.086, -0.068)                         | <0.0001         | -0.123 (-0.133, -0.113)                         | <0.0001         | -0.057 (-0.064, -0.050)                         | <0.0001         |
| 30-147                                                                      | -0.117 (-0.125, -0.109)                         | <0.0001         | -0.171 (-0.179, -0.162)                         | <0.0001         | -0.083 (-0.089, -0.077)                         | <0.0001         |
| <b>Time since cessation of smoking (years)</b>                              |                                                 |                 |                                                 |                 |                                                 |                 |
| 0 (Current smokers)                                                         | Ref.                                            |                 | Ref.                                            |                 | Ref.                                            |                 |
| 1                                                                           | 0.020 (-0.004, 0.043)                           | 0.10            | 0.019 (-0.007, 0.046)                           | 0.16            | 0.020 (0.003, 0.038)                            | 0.02            |
| 2-4                                                                         | 0.059 (0.043, 0.074)                            | <0.0001         | 0.071 (0.053, 0.088)                            | <0.0001         | 0.051 (0.039, 0.063)                            | <0.0001         |
| 5-9                                                                         | 0.064 (0.051, 0.077)                            | <0.0001         | 0.079 (0.064, 0.094)                            | <0.0001         | 0.057 (0.047, 0.067)                            | <0.0001         |
| 10-20                                                                       | 0.089 (0.080, 0.099)                            | <0.0001         | 0.121 (0.111, 0.132)                            | <0.0001         | 0.074 (0.066, 0.081)                            | <0.0001         |
| 20-50                                                                       | 0.122 (0.114, 0.131)                            | <0.0001         | 0.171 (0.161, 0.181)                            | <0.0001         | 0.096 (0.089, 0.102)                            | <0.0001         |

<sup>a</sup> Linear regression, adjusted for sex, age, BMI (underweight/ normal weight/ overweight/ obesity), physical activity (inactive/ low/ medium and high), prevalence of cardiovascular disease and diabetes, and batch effect.

Supplemental Material, Table S4. Associations between smoking behavior and *F2RL3* methylation intensity among current smokers (n=654) after mutual control for smoking exposure variables

| Smoking characteristics                                 | <i>F2RL3</i> CpG2                               |                 | <i>F2RL3</i> CpG4                               |                 | <i>F2RL3</i> CpG5                               |                 |
|---------------------------------------------------------|-------------------------------------------------|-----------------|-------------------------------------------------|-----------------|-------------------------------------------------|-----------------|
|                                                         | Regression coefficient <sup>a</sup><br>(95% CI) | <i>P</i> -value | Regression coefficient <sup>a</sup><br>(95% CI) | <i>P</i> -value | Regression coefficient <sup>a</sup><br>(95% CI) | <i>P</i> -value |
| Cumulative dose of smoking (pack-years)                 |                                                 |                 |                                                 |                 |                                                 |                 |
| 0.2-9                                                   | Ref.                                            |                 | Ref.                                            |                 | Ref.                                            |                 |
| 10-19                                                   | -0.042 (-0.084, 0.000)                          | 0.05            | -0.068 (-0.114, -0.023)                         | 0.0036          | -0.032 (-0.063, -0.001)                         | 0.04            |
| 20-29                                                   | -0.066 (-0.105, -0.026)                         | 0.0013          | -0.092 (-0.135, -0.049)                         | <0.0001         | -0.052 (-0.081, -0.023)                         | 0.0005          |
| 30-147                                                  | -0.073 (-0.113, -0.033)                         | 0.0003          | -0.104 (-0.147, -0.060)                         | <0.0001         | -0.053 (-0.082, -0.024)                         | 0.0004          |
| Intensity of smoking (average number of cigarette /day) |                                                 |                 |                                                 |                 |                                                 |                 |
| 1-9                                                     | Ref.                                            |                 | Ref.                                            |                 | Ref.                                            |                 |
| 10-19                                                   | -0.043 (-0.073, -0.013)                         | 0.0051          | -0.054 (-0.086, -0.021)                         | 0.0012          | -0.033 (-0.055, -0.011)                         | 0.0028          |
| 20-29                                                   | -0.038 (-0.068, -0.007)                         | 0.02            | -0.045 (-0.079, -0.012)                         | 0.0083          | -0.032 (-0.055, -0.009)                         | 0.0055          |
| 30-60                                                   | -0.069 (-0.106, -0.032)                         | 0.0003          | -0.075 (-0.115, -0.035)                         | 0.0003          | -0.046 (-0.073, -0.019)                         | 0.0009          |

<sup>a</sup> Linear regression, adjusted for sex, age, BMI (underweight/ normal weight/ overweight/ obesity), physical activity (inactive/ low/ medium and high), prevalence of cardiovascular disease and diabetes, and batch effect, as well as cumulative dose and current intensity of smoking each other.

Supplemental Material, Table S5. Associations between smoking behavior and *F2RL3* methylation intensity among former smokers (n=1136) after mutual control for smoking exposure variables

| Smoking characteristics                 | <i>F2RL3</i> CpG2                               |                 | <i>F2RL3</i> CpG4                               |                 | <i>F2RL3</i> CpG5                               |                 |
|-----------------------------------------|-------------------------------------------------|-----------------|-------------------------------------------------|-----------------|-------------------------------------------------|-----------------|
|                                         | Regression coefficient <sup>a</sup><br>(95% CI) | <i>P</i> -value | Regression coefficient <sup>a</sup><br>(95% CI) | <i>P</i> -value | Regression coefficient <sup>a</sup><br>(95% CI) | <i>P</i> -value |
| Cumulative dose of smoking (pack-years) |                                                 |                 |                                                 |                 |                                                 |                 |
| 0.5-9                                   | Ref.                                            |                 | Ref.                                            |                 | Ref.                                            |                 |
| 10-19                                   | -0.008 (-0.021, 0.005)                          | 0.21            | -0.017 (-0.032, -0.001)                         | 0.03            | -0.006 (-0.016, 0.004)                          | 0.24            |
| 20-29                                   | -0.016 (-0.031, -0.001)                         | 0.03            | -0.042 (-0.059, -0.024)                         | <0.0001         | -0.014 (-0.025, -0.002)                         | 0.02            |
| 30-101                                  | -0.020 (-0.036, -0.005)                         | 0.01            | -0.044 (-0.062, -0.025)                         | <0.0001         | -0.010 (-0.022, -0.002)                         | 0.10            |
| Time since cessation of smoking (years) |                                                 |                 |                                                 |                 |                                                 |                 |
| 1                                       | Ref.                                            |                 | Ref.                                            |                 | Ref.                                            |                 |
| 2-4                                     | 0.038 (0.010, 0.066)                            | 0.0089          | 0.051 (0.018, 0.084)                            | 0.0027          | 0.031 (0.009, 0.052)                            | 0.0057          |
| 5-9                                     | 0.044 (0.017, 0.071)                            | 0.0015          | 0.058 (0.026, 0.089)                            | 0.0003          | 0.037 (0.017, 0.058)                            | 0.0004          |
| 10-20                                   | 0.063 (0.038, 0.088)                            | <0.0001         | 0.090 (0.061, 0.120)                            | <0.0001         | 0.051 (0.032, 0.070)                            | <0.0001         |
| 20-50                                   | 0.095 (0.069, 0.121)                            | <0.0001         | 0.132 (0.101, 0.163)                            | <0.0001         | 0.072 (0.052, 0.092)                            | <0.0001         |

<sup>a</sup> Linear regression, adjusted for sex, age, BMI (underweight/ normal weight/ overweight/ obesity), physical activity (inactive/ low/ medium and high), prevalence of cardiovascular disease and diabetes, and batch effect, as well as cumulative dose and time since cessation of smoking each other.

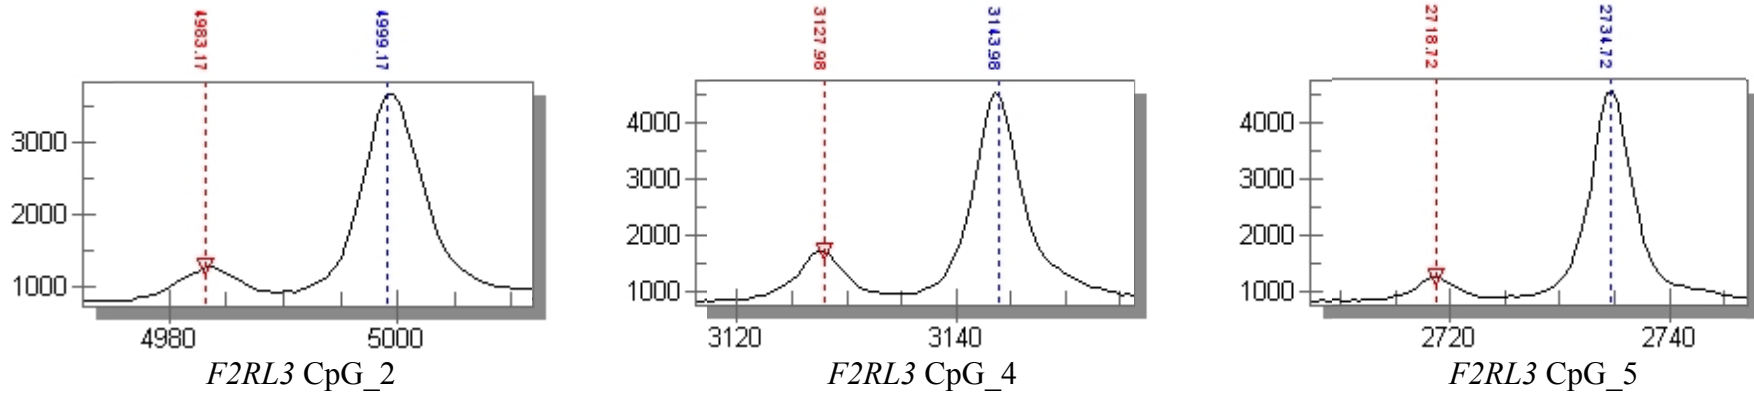

Supplemental Material, Figure S1. Examples for results of MassArray Analysis of *F2RL3* methylation. The graphs show the detection intensity (y-axis) of amplicon fragments after base-specific cleavage. Different masses for originally methylated and non-methylated CpG are labeled on the x-axis. The proportion of methylated CpG at these loci thus can be determined by the ratio of detection intensities at masses corresponding to fragments originating from methylated and non-methylated CpG (blue and red vertical lines, respectively). The graphs were taken from a single sample with 86%, 80%, and 90% methylation at *F2RL3* CpG\_2, CpG\_4 and CpG5, respectively (from left to right).
